# Supplementary material for: PF127 Hydrogel-Based Delivery of Exosomal CTNNB1 from Mesenchymal Stem Cells Induces Osteogenic Differentiation during the Repair of Alveolar Bone Defects
Source: MDPI journal article supplement (doi:10.3390/nano13061083), 2023-03-16
Supplement: s1 [file s1]

Article

# PF127 Hydrogel-Based Delivery of Exosomal CTNNB1 from Mesenchymal Stem Cells Induces Osteogenic Differentiation during the Repair of Alveolar Bone Defects

Longlong He <sup>1,2,†</sup>, Qin Zhou <sup>1,2,†</sup>, Hengwei Zhang <sup>1,†</sup>, Ningbo Zhao <sup>1,2</sup> and Lifan Liao <sup>1,2,\*</sup>

<sup>1</sup> Key Laboratory of Shaanxi Province for Craniofacial Precision Medicine Research, College of Stomatology, Xi'an Jiaotong University, 710004 Xi'an, China

<sup>2</sup> Department of Implant Dentistry, College of Stomatology, Xi'an Jiaotong University, 710004 Xi'an, China

\* Correspondence: liaolifan2022@126.com; Tel.: +86-15771915456

† These authors contributed equally to this work.

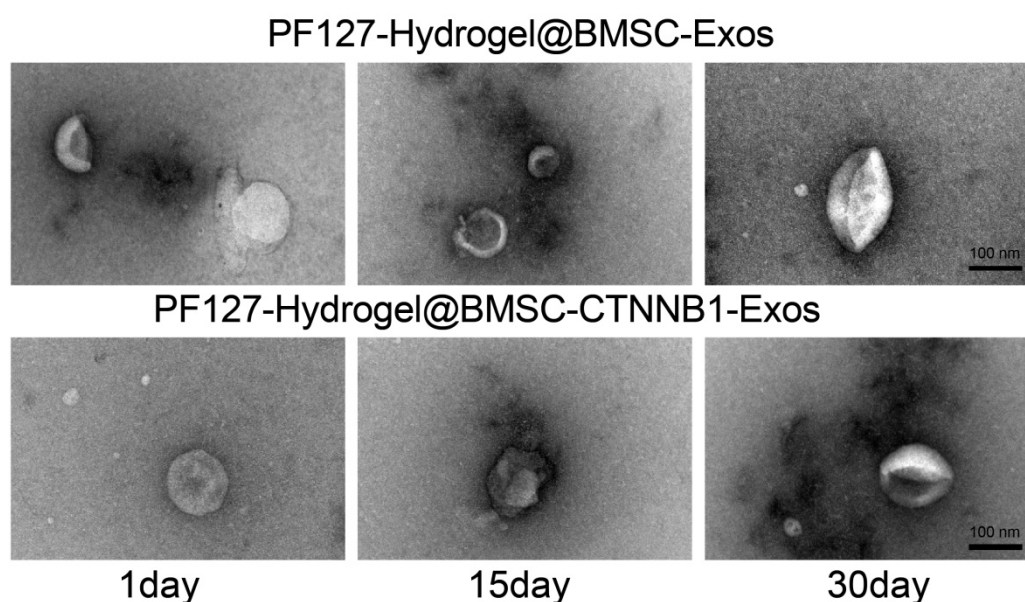

**Figure S1.** The morphological changes of PF127 hydrogel@BMSC-CTNNB1-Exos and PF127 hydrogel@BMSC-Exos at day 1, 15 and 30 as observed by SEM to test long-term stability.

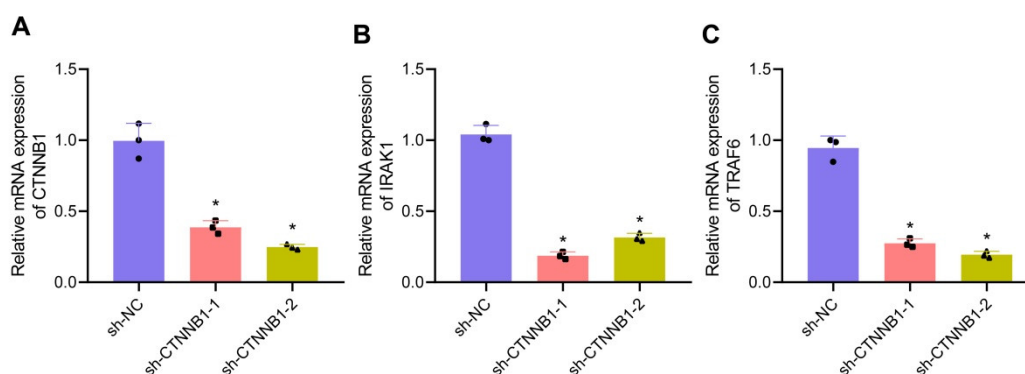

**Figure S2.** Knockdown efficiency of CTNNB1 (A), IRAK1 (B) and TRAF6 (C) detected by RT-qPCR. \*  $p < 0.05$  vs. the sh-NC group. Cell experiments were repeated three times.

**Table S1.** Targeted knockdown using shRNA sequences.

| shRNA             | Sequence                     |
|-------------------|------------------------------|
| sh-NC             | 5'-CGATAACGTTACGAAGTACCAT-3' |
| sh-CTNNB1-1 (rat) | 5'-GGGCAATCCTGAGGAAGAAGA-3'  |
| sh-CTNNB1-2 (rat) | 5'-GGGCAATCCTGAGGAAGAAGA-3'  |
| sh-IRAK1-1 (rat)  | 5'-GCAGTAATGAGAAATACTACA-3'  |
| sh-IRAK1-2 (rat)  | 5'-GGTTTCGTCACCCAAATATCG-3'  |
| sh-TRAF6-1 (rat)  | 5'-GCGATCGATTGACTGACAACA-3'  |
| sh-TRAF6-2 (rat)  | 5'-GCTACTATGAGTCTCTTAAAC-3'  |

Note: sh-, short hairpin RNA; NC, negative control.

**Table S2.** qPCR primer sequences for ChIP.

| Gene          | Sequence                                                                   |
|---------------|----------------------------------------------------------------------------|
| p-miR-146a-5p | Forward: 5'-CTGGCCCCATGTAGAACTGG-3'<br>Reverse: 5'-CCCCCAGGGTACACAAACTC-3' |

Note: ChIP, chromatin immunoprecipitation.

**Table S3.** Primer sequence for RT-qPCR.

| Gene              | Sequence                                                                      |
|-------------------|-------------------------------------------------------------------------------|
| CTNNB1 (rat)      | Forward: 5'-ATCATTCTGGCCAGTGGTGG-3'<br>Reverse: 5'-GACAGCACCTTCAGCACTCT-3'    |
| IRAK1 (rat)       | Forward: 5'-CCCCTCCTCCATCAAGCCAAG-3'<br>Reverse: 5'-GGTACACACACCCAAAACCCAC-3' |
| TRAF6 (rat)       | Forward: 5'-ACTTGATCTCGGAGTGCTGC-3'<br>Reverse: 5'-CAGTCAATCGATCGCACACG-3'    |
| RUNX2 (rat)       | Forward: 5'-GCGGTGCAAACCTTCTCCAG-3'<br>Reverse: 5'-TCACTGCACTGAAGAGGCTG-3'    |
| OCN (BGLAP) (rat) | Forward: 5'-GAATAGACTCCGGCGCTACC-3'<br>Reverse: 5'-TCCTGGAAGCCAATGTGGTC-3'    |
| miR-146a-5p (rat) | Forward: 5'-TGAGAACTGAATTCCATGGGTT-3'<br>Reverse: Universal sequence          |
| GAPDH (rat)       | Forward: 5'-GCATCTTCTTGTGCAGTGCC-3'<br>Reverse: 5'-GATGGTGATGGGTTTCCCGT-3'    |
| U6 (rat)          | Forward: 5'-CTCGCTTCGGCAGCACA-3'<br>Reverse: Universal sequence               |

Note: RT-qPCR, reverse transcription-quantitative polymerase chain reaction.
